# Supplementary material for: Integrated Pleiotropic Gene Set Unveils Comorbidity Insights across Digestive Cancers and Other Diseases
Source: MDPI journal article supplement (doi:10.3390/genes15040478), 2024-04-10
Supplement: s1 [file s1]

# Digestive cancer

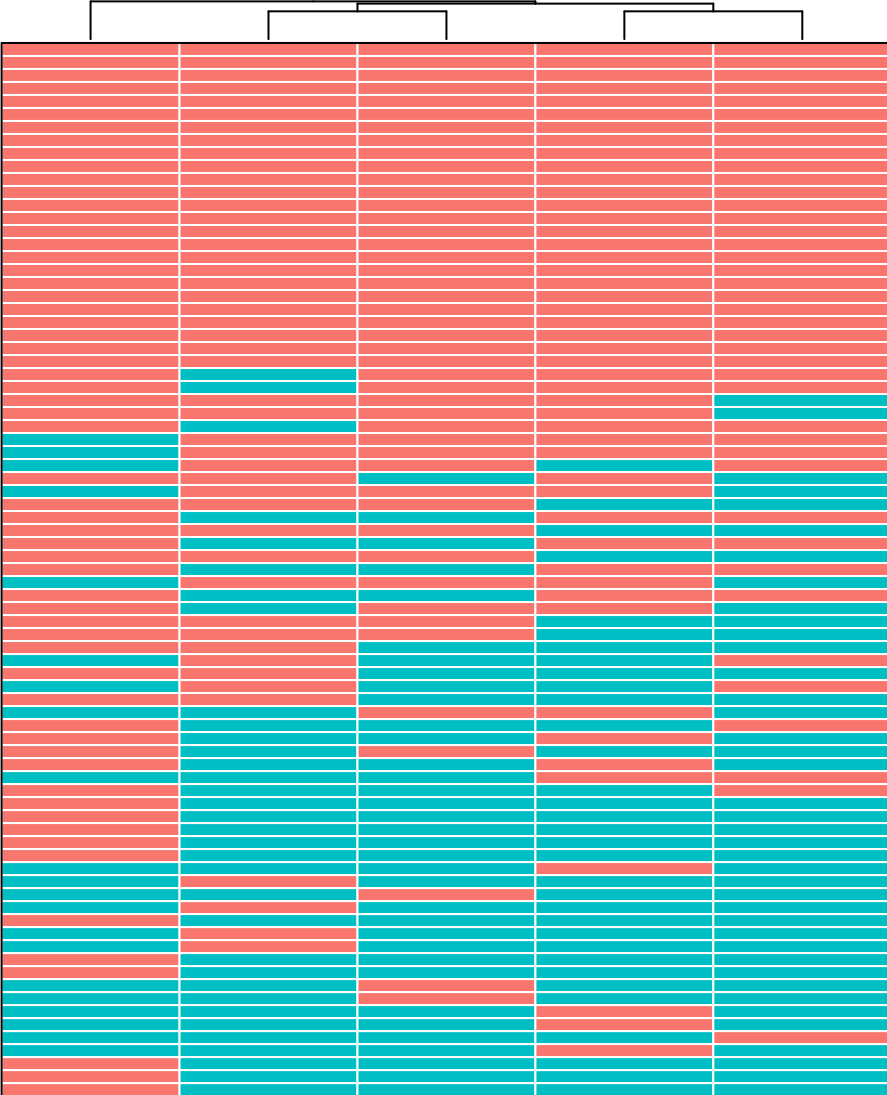

**Comorbidity**

YES

NO

Colorectal Cancer

Stomach Cancer

Esophageal Cancer

Hepatobiliary Cancer

Pancreatic Cancer
