# Supplementary figures and images for: Integrated Pleiotropic Gene Set Unveils Comorbidity Insights across Digestive Cancers and Other Diseases
Source: MDPI journal article supplement (doi:10.3390/genes15040478), 2024-04-10

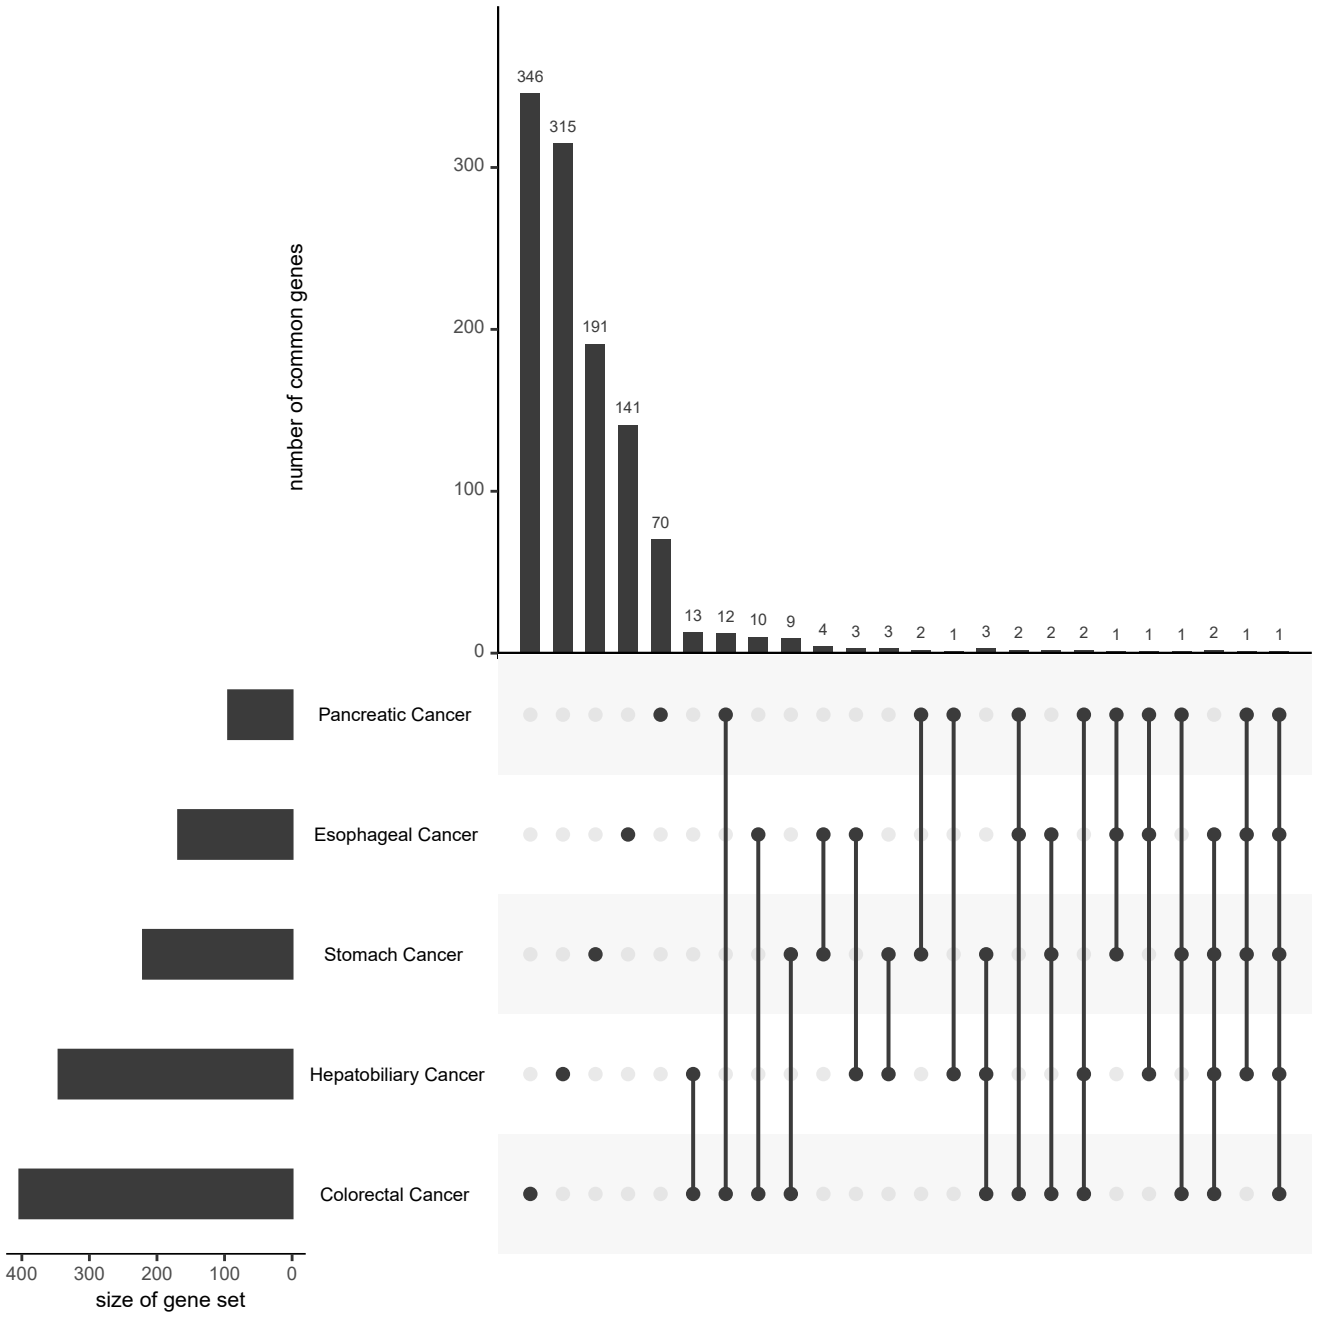

Supplement: s1 [file s1]

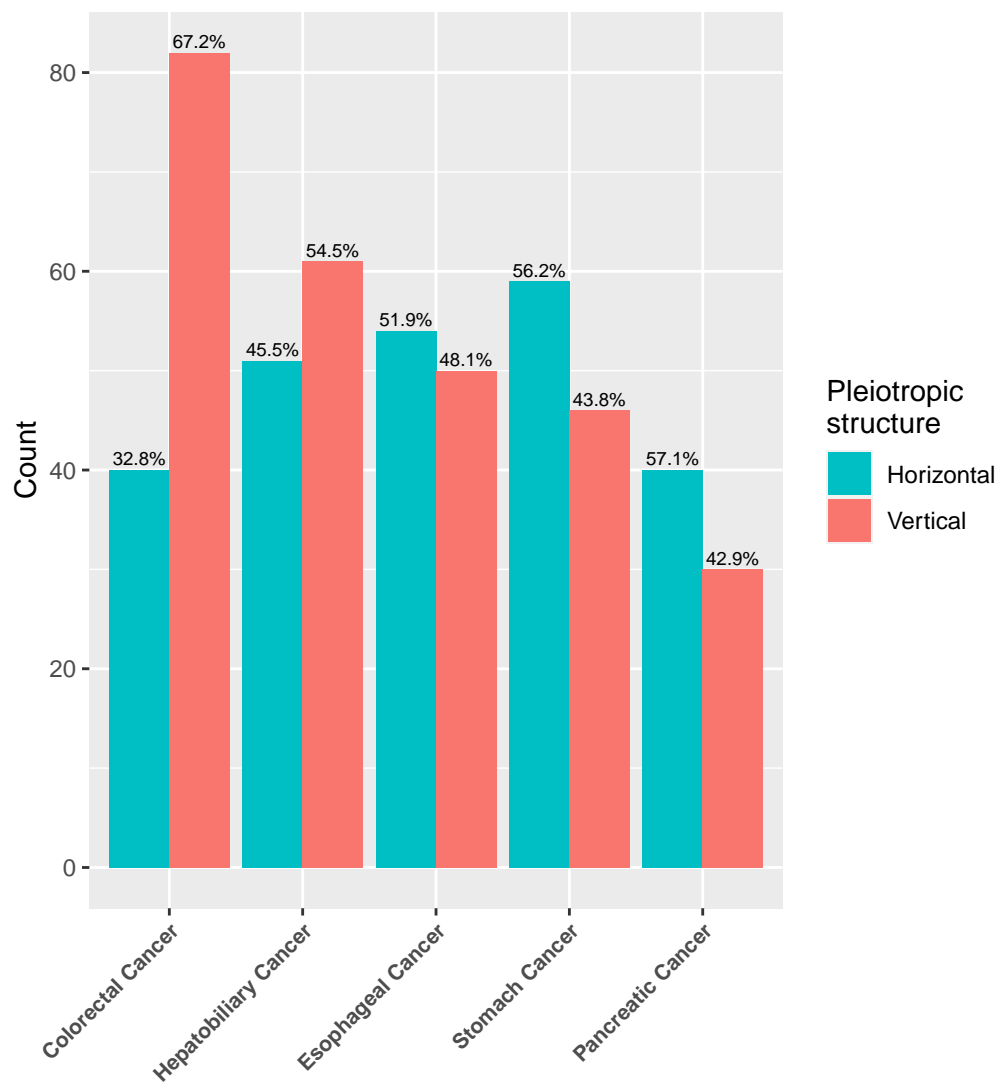

Supplement: s1 [file s1]
